# Supplementary material
Source: PubMed Central journal article supplement (PMC3792651)
Supplement: NIHMS405760-supplement-supplement_material.pdf [file NIHMS405760-supplement-supplement_material.pdf]

# THE LANCET Oncology

## Supplementary webappendix

This webappendix formed part of the original submission and has been peer reviewed. We post it as supplied by the authors.

Supplement to: Aft R, Naughton M, Trinkaus K, et al. Effect of zoledronic acid on disseminated tumour cells in women with locally advanced breast cancer: an open label, randomised, phase 2 trial. *Lancet Oncol* 2010; published online April 1. DOI:10.1016/S1470-2045(10)70054-1.

Web appendix for :

**Effect of zoledronic acid on disseminated tumour cells in women with locally advanced breast cancer: an open label, randomised, phase 2 trial**

**Supplemental Table 1: Bone Turnover Markers Changes over Time According to Treatment Group**

| All Patients            |               |       |       |                        |          |    |       |                        |          |                                      |
|-------------------------|---------------|-------|-------|------------------------|----------|----|-------|------------------------|----------|--------------------------------------|
| Marker                  | Time (months) | No ZA |       |                        |          | ZA |       |                        |          | P (Comparing %Change in ZA vs no ZA) |
|                         |               | N     | Mean  | % Change from baseline | P-value* | N  | Mean  | % Change from baseline | P-value* |                                      |
| NTx (nmol/mol)          | 0             | 59    | 38.61 |                        |          | 60 | 38.35 |                        |          | <0.0001                              |
| NTx                     | 3             | 52    | 48.40 | 25.37                  | <0.0001  | 57 | 17.35 | -54.76                 | <0.0001  |                                      |
| NTx                     | 12            | 39    | 50.77 | 31.49                  | 0.0474   | 41 | 17.46 | -54.46                 | <0.0001  |                                      |
| Osteo (ng/ml)           | 0             | 58    | 11.38 |                        |          | 60 | 12.24 |                        |          | <0.0001                              |
| Osteo                   | 3             | 50    | 14.95 | 31.41                  | 0.0007   | 57 | 9.57  | -21.76                 | <0.0001  |                                      |
| Osteo                   | 12            | 40    | 16.07 | 41.22                  | 0.0012   | 42 | 7.74  | -36.76                 | <0.0001  |                                      |
| BSAP (ug/L)             | 0             | 58    | 10.31 |                        |          | 60 | 9.69  |                        |          | <0.0001                              |
| BSAP                    | 3             | 51    | 10.44 | 1.25                   | 0.7739   | 57 | 7.26  | -25.05                 | <0.0001  |                                      |
| BSAP                    | 12            | 40    | 13.60 | 31.90                  | 0.0012   | 42 | 6.52  | -32.75                 | <0.0001  |                                      |
| Premenopausal Patients  |               |       |       |                        |          |    |       |                        |          |                                      |
| Marker                  | Time (months) | No ZA |       |                        |          | ZA |       |                        |          | P (Comparing %Change in ZA vs no ZA) |
|                         |               | N     | Mean  | % Change from baseline | P-value* | N  | Mean  | % Change from baseline | P-value* |                                      |
| NTx                     | 0             | 33    | 36.12 |                        |          | 31 | 39.39 |                        |          | <0.0001                              |
| NTx                     | 3             | 30    | 48.90 | 35.38                  | <0.0001  | 30 | 17.37 | -55.90                 | <0.0001  |                                      |
| NTx                     | 12            | 21    | 46.62 | 29.07                  | 0.1460   | 22 | 17.86 | -54.66                 | <0.0001  |                                      |
| Osteo                   | 0             | 32    | 10.98 |                        |          | 31 | 11.27 |                        |          | <0.0001                              |
| Osteo                   | 3             | 29    | 14.10 | 28.42                  | 0.0013   | 30 | 8.75  | -22.36                 | 0.0019   |                                      |
| Osteo                   | 12            | 21    | 15.03 | 36.89                  | 0.0242   | 22 | 7.17  | -36.38                 | <0.0001  |                                      |
| BSAP                    | 0             | 32    | 9.31  |                        |          | 31 | 8.91  |                        |          | <0.0001                              |
| BSAP                    | 3             | 30    | 10.15 | 9.02                   | 0.2162   | 30 | 7.10  | -20.31                 | 0.0025   |                                      |
| BSAP                    | 12            | 21    | 13.77 | 47.91                  | 0.0028   | 22 | 6.33  | -28.96                 | <0.0001  |                                      |
| Postmenopausal Patients |               |       |       |                        |          |    |       |                        |          |                                      |
| Marker                  | Time (months) | No ZA |       |                        |          | ZA |       |                        |          | P (Comparing %Change in ZA vs no ZA) |
|                         |               | N     | Mean  | % Change from baseline | P-value* | N  | Mean  | % Change from baseline | P-value* |                                      |
| NTx                     | 0             | 26    | 41.77 |                        |          | 29 | 37.24 |                        |          | 0.0009                               |
| NTx                     | 3             | 22    | 47.73 | 14.27                  | 0.2119   | 27 | 17.33 | -53.46                 | <0.0001  |                                      |
| NTx                     | 12            | 18    | 55.61 | 33.13                  | 0.1887   | 19 | 17.00 | -54.35                 | <0.0001  |                                      |
| Osteo                   | 0             | 26    | 11.87 |                        |          | 29 | 13.27 |                        |          | <0.0001                              |
| Osteo                   | 3             | 21    | 16.13 | 35.89                  | 0.0530   | 27 | 10.49 | -20.95                 | 0.0099   |                                      |
| Osteo                   | 12            | 19    | 17.22 | 45.07                  | 0.0222   | 20 | 8.36  | -37.00                 | 0.0068   |                                      |
| BSAP                    | 0             | 26    | 11.53 |                        |          | 29 | 10.53 |                        |          | <0.0001                              |
| BSAP                    | 3             | 21    | 10.85 | -5.90                  | 0.4449   | 27 | 7.45  | -29.25                 | 0.0068   |                                      |
| BSAP                    | 12            | 19    | 13.41 | 16.31                  | 0.1416   | 20 | 6.73  | -36.09                 | 0.0008   |                                      |

In premenopausal women, significant elevations were observed compared to baseline for NTx and osteocalcin at 3 months (both  $p < 0.001$ ) and osteocalcin and BSAP at 12 months (both  $p < 0.02$ ). In postmenopausal women, a significant elevation in osteocalcin was observed at 12 months ( $p = 0.022$ ).

**Supplemental Table 2. Bone Mineral Density Changes over Time According to Treatment Group**

| All Patients           |               |       |                            |                        |                |    |                            |                        |                |                                      |
|------------------------|---------------|-------|----------------------------|------------------------|----------------|----|----------------------------|------------------------|----------------|--------------------------------------|
|                        | Time (months) | No ZA |                            |                        |                | ZA |                            |                        |                | P (Comparing %Change in ZA vs no ZA) |
|                        |               | N     | Mean (gm/cm <sup>2</sup> ) | % Change from Baseline | P* (t0 vs t12) | N  | Mean (gm/cm <sup>2</sup> ) | % Change from Baseline | P* (t0 vs t12) |                                      |
| <b>Hip</b>             | 0             | 53    | 0.949                      |                        |                | 56 | 1.001                      |                        |                |                                      |
|                        | 12            | 42    | 0.915                      | -3.53                  | 0.0002         | 41 | 1.059                      | 5.79                   | 0.0275         | <0.0001                              |
| <b>Spine</b>           | 0             | 52    | 1.041                      |                        |                | 56 | 1.084                      |                        |                |                                      |
|                        | 12            | 42    | 0.995                      | -4.42                  | 0.0054         | 41 | 1.109                      | 2.31                   | 0.5861         | 0.0519                               |
| <b>Wrist</b>           | 0             | 53    | 0.585                      |                        |                | 56 | 0.594                      |                        |                |                                      |
|                        | 12            | 41    | 0.571                      | -1.41                  | 0.0516         | 40 | 0.607                      | 1.17                   | 0.5157         | 0.0191                               |
| Premenopausal Patients |               |       |                            |                        |                |    |                            |                        |                |                                      |
|                        | Time (months) | No ZA |                            |                        |                | ZA |                            |                        |                | P (Comparing %Change in ZA vs no ZA) |
|                        |               | N     | Mean (gm/cm <sup>2</sup> ) | % Change from Baseline | P* (t0 vs t12) | N  | Mean (gm/cm <sup>2</sup> ) | % Change from Baseline | P* (t0 vs t12) |                                      |
| <b>Hip</b>             | 0             | 29    | 0.966                      |                        |                | 30 | 1.043                      |                        |                |                                      |
|                        | 12            | 22    | 0.929                      | -3.83                  | 0.0051         | 20 | 1.142                      | 9.49                   | 0.0198         | 0.0003                               |
| <b>Spine</b>           | 0             | 23    | 1.087                      |                        |                | 30 | 1.165                      |                        |                |                                      |
|                        | 12            | 22    | 1.011                      | -6.99                  | 0.0001         | 20 | 1.202                      | 3.16                   | 0.8602         | 0.0185                               |
| <b>Wrist</b>           | 0             | 29    | 0.586                      |                        |                | 30 | 0.614                      |                        |                |                                      |
|                        | 12            | 21    | 0.584                      | -0.20                  | 0.0764         | 19 | 0.629                      | 1.25                   | 0.3453         | 0.3333                               |
| Post Menopausal        |               |       |                            |                        |                |    |                            |                        |                |                                      |
|                        | Time (months) | No ZA |                            |                        |                | ZA |                            |                        |                | P (Comparing %Change in ZA vs no ZA) |
|                        |               | N     | Mean (gm/cm <sup>2</sup> ) | % Change from Baseline | P* (t0 vs t12) | N  | Mean (gm/cm <sup>2</sup> ) | % Change from Baseline | P* (t0 vs t12) |                                      |
| <b>Hip</b>             | 0             | 24    | 0.927                      |                        |                | 26 | 0.953                      |                        |                |                                      |
|                        | 12            | 20    | 0.900                      | -2.91                  | 0.0009         | 21 | 0.979                      | 2.73                   | 0.4964         | 0.011                                |
| <b>Spine</b>           | 0             | 24    | 0.988                      |                        |                | 26 | 0.990                      |                        |                |                                      |
|                        | 12            | 20    | 0.977                      | -1.11                  | 0.5645         | 21 | 1.021                      | 3.13                   | 0.0066         | 0.5031                               |
| <b>Wrist</b>           | 0             | 24    | 0.583                      |                        |                | 26 | 0.571                      |                        |                |                                      |
|                        | 12            | 20    | 0.557                      | -2.66                  | 0.1813         | 21 | 0.588                      | 1.67                   | 0.1158         | 0.0439                               |

Premenopausal women experienced a significant gain in bone density at the hip (p=0.0198) and postmenopausal women experienced a significant gain in the spine compared to baseline (p=0.0066).

**Supplemental Figure 1. Bone Turnover Markers by time according to menopausal status and treatment arm.**

Standard error of the mean for bone turnover markers. P-values correspond to intra-group comparisons from baseline to 12 months.

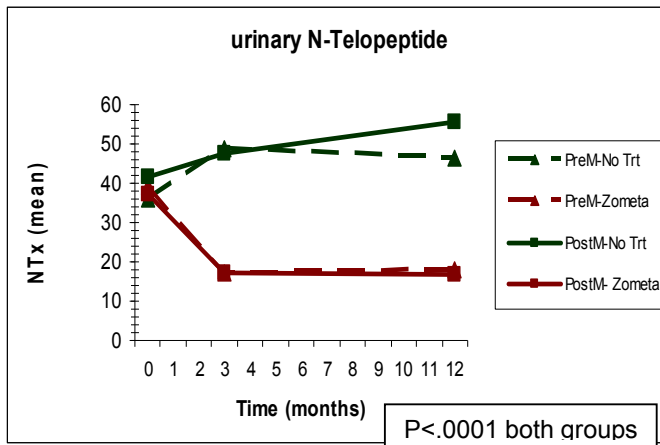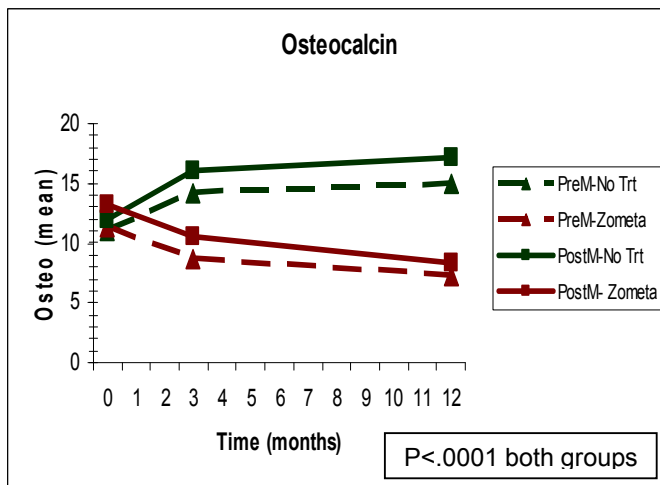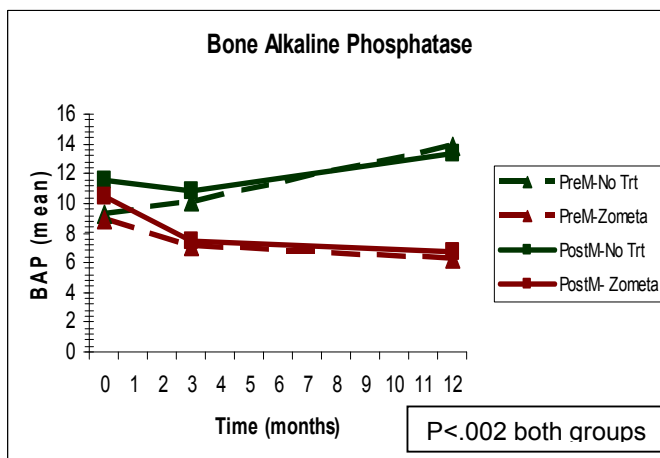

**Supplemental Figure 2. Mean percent change in Bone Mineral Density at one year according to site, menopausal status, and treatment arm**

Standard error of the mean percent change in bone density at 12 months.

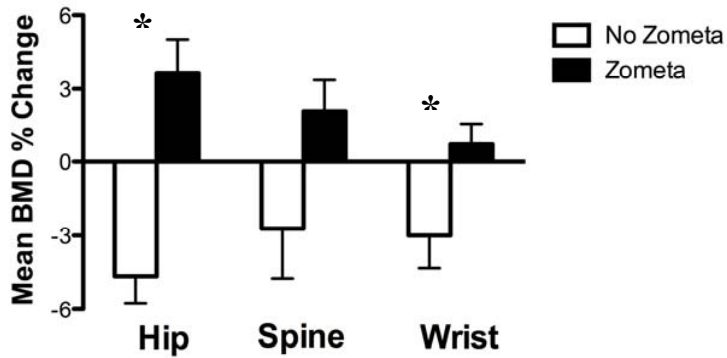

**Premenopausal Patients**

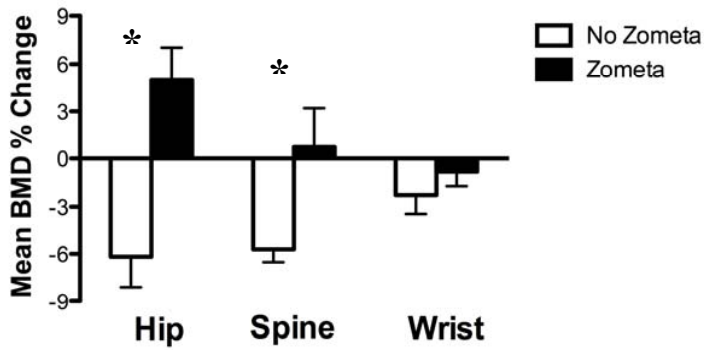

**Postmenopausal Patients**

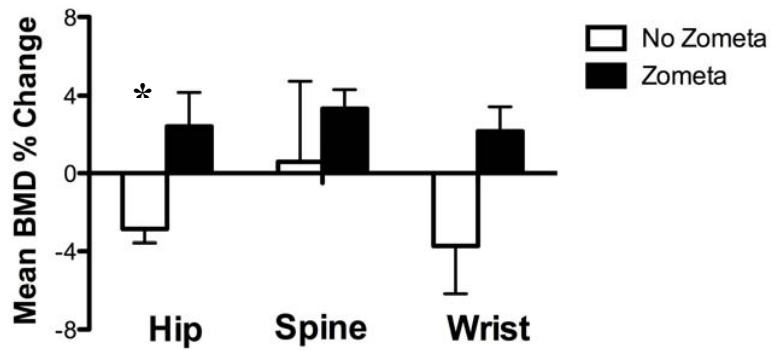

\* P=<0.05
